# Supplementary material for: Two-dimensional hole gas in organic semiconductors
Source: Research Square preprint supplement (doi:10.21203/rs.3.rs-102201/v1), 2020-11-06
Supplement: Supplementary file 1 [file 4af6138f765be1f48f05d364.pdf]

# Supplementary Materials for

## Two-dimensional hole gas in organic semiconductors

Naotaka Kasuya, Juntao Tsurumi, Toshihiro Okamoto, Shun Watanabe<sup>‡</sup>, and Jun Takeya<sup>‡</sup>

<sup>‡</sup> To whom correspondence should be addressed; E-mail: swatanabe@edu.k.u-tokyo.ac.jp,  
and takeya@k.u-tokyo.ac.jp

### This PDF file includes:

- A. Details of transport measurements
- B. Determination of Fermi level
- C. Sample dependence of transport properties
- D. Magnetoresistance of heavily doped C<sub>8</sub>-DNBDT-NW

### A. DETAILS OF TRANSPORT MEASUREMENTS

#### Sample preparation

The electric double-layer transistors (EDLTs) studied in this work were fabricated on a polyethylene naphthalate (PEN) substrate. The PEN film (Teijin Ltd., Q65HA, 125  $\mu\text{m}$ ) was pre-baked at 150 °C for 3 h to reduce internal stress and cooled down slowly to room temperature. After cleaning the PEN film with acetone and 2-propanol in an ultrasonic bath, parylene (dix-SR, KISCO Ltd.) was coated onto the PEN film via chemical vapor deposition, achieving a thickness of 200 nm. The single-crystal bilayer C<sub>8</sub>-DNBDT-NW<sup>3</sup> was grown on the parylene layer from 3-chlorothiophene with a concentration of 0.020 wt% at 70 °C via the continuous edge casting method.<sup>2</sup> Gold (62 nm)/chromium (8 nm) were evaporated on the parylene/PEN substrate and single-crystal C<sub>8</sub>-DNBDT-NW through shadow masks to form the source, drain, side gate electrodes, and voltage probes. Laser etching (V-Technology Co., Ltd., Callisto (266 nm)) was carried out for the C<sub>8</sub>-DNBDT-NW layer to form Hall bar.

The ion gel film was spin-coated onto the PEN film (Teijin Ltd., Q51, 25  $\mu\text{m}$ ) with a solution composed of poly(vinylidene fluoride-*co*-hexafluoropropylene)(P(VDF-HFP)), ionic liquid (1-Ethyl-3-methylimidazolium: [EMIM] and bis(trifluoromethylsulfonyl)imide: [TFSI], respectively) and, acetonitrile (1:2:10 wt. ratio). After cutting the ion gel with the PEN film, EDLTs were completed by the lamination of the ion gel and the PEN film onto the Hall bar-shaped single-crystal C<sub>8</sub>-DNBDT-NW and side-top gate.

### Transport measurement

Low-temperature magnetotransport measurements were performed at least 12 h after the EDLT sample was inserted into a He gas-exchange cryostat with a superconducting magnet. Transfer characteristics in the linear regime (at drain voltage  $V_D = -0.10$  V) were continuously recorded by a sweeping gate voltage  $V_G$  at a rate of 50 mV per 30 s. Introduction of the holes onto C<sub>8</sub>-DNBDT-NW at 260 K was undertaken by applying  $V_G$ , for which  $V_G$  was negatively increased from 0 V to the target voltage at a rate of 50 mV per 30 s. When  $V_G$  was changed, samples were heated up to 260 K and discharged with  $V_G = 0$  V. After charging the C<sub>8</sub>-DNBDT-NW by applying the target  $V_G$  at 260 K, the temperature  $T$  dependence of the sheet resistance  $R_S$  is measured by monitoring the drain current  $I_D$  and the voltage probes. Constant  $V_D = -0.10$  V is applied during the slow ramping of  $T$  downwards and upwards with the ramping rate of 0.2 K min<sup>-1</sup>. Hall measurements were performed with a constant DC  $I_D$  (1  $\mu\text{A}$ ). During sweeping, an external magnetic field  $B$  was applied perpendicular to the sample plane, not exceeding  $\pm 10$  T and with a slow sweeping rate of 0.01 T s<sup>-1</sup>.

### Determination of Fermi level

The observation of metallic states in single-crystal C<sub>8</sub>-DNBDT-NW with a high carrier density exceeding  $4 \times 10^{13} \text{ cm}^{-2}$  in this work is accompanied by Fermi degeneracy. To investigate the relationship between the carrier density  $n$  and Fermi level  $\mu'$ , we estimate the Fermi level of C<sub>8</sub>-DNBDT-NW from the following equation:

$$n = \int_{-\infty}^{\infty} D(E) (1 - f(E)) dE \quad (1)$$

Where  $D(E)$  is the density of states of C<sub>8</sub>-DNBDT-NW and  $f(E)$  is the Fermi distribution function  $f(E) = [1 + \exp((E - \mu')/(k_B T))]^{-1}$ . The carrier density  $n$  is estimated from the Hall effect at 180 K, and is assumed to be temperature-independent at least within the temperature from 180 K to 260 K. The density of states of C<sub>8</sub>-DNBDT-NW is calculated

using CRYSTAL 17 at the B3LYP functional and POB-DZVP basis set level.

## B. SAMPLE DEPENDENCE OF TRANSPORT PROPERTIES

### Sheet conductivity $\sigma_{4T}$ at 260 K

Figure. B-1a and b show the reproducibility of multiple gate sweep and the sample dependence of sheet conductivity  $\sigma_{4T}$  at 260 K, respectively, obtained by  $\sigma_{4T} = (L_{4T}/W)(I_D/V_{4T})$  as a function of  $V_G$  ( $L_{4T}$  is the length between four-terminal voltage probes,  $W$  is the channel width, and  $V_{4T}$  is the potential difference between four-terminal voltage probes). All measurements are performed with  $V_D = -0.10$  V during  $V_G$  sweeping at a rate of 50 mV per 30 s.  $\sigma_{4T}$  reaches around  $60 \mu\text{S}$  in all samples reproducibly, although threshold voltage depends on the samples.

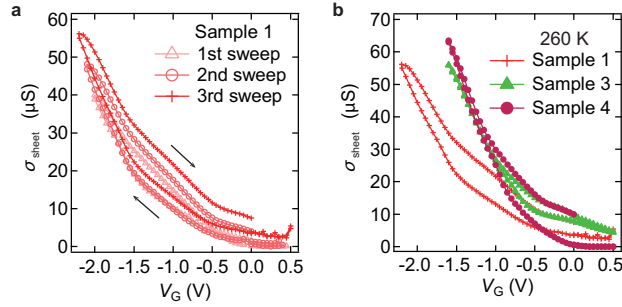

**SI Fig. B-1:  $V_G$  dependence of  $\sigma_{4T}$  at 260 K.**(a) Multiple  $V_G$  sweep in sample 1. (b) Sample dependence of  $\sigma_{4T}$

### Temperature dependence of sheet resistance $R_S$

Figure B-2 shows the temperature  $T$  dependence of sheet resistance  $R_S$  ( $= \sigma_{4T}^{-1}$ ) of sample 1, 3 and 4 (the  $R_S(T)$  of sample 2 is described in the main text). In sample 1, Insulator-to-metal crossover around quantum resistance  $h/e^2$  (black dash line in the panel) is observed with negatively increasing  $V_G$  from  $-1.0$  V to  $-2.2$  V. The positive  $dR/dT$  is observed reproducibly for the samples 3 and 4 (Fig. B-2 b).

### Hall mobility $\mu_{\text{Hall}}$ and Hall carrier density $n_{\text{Hall}}$

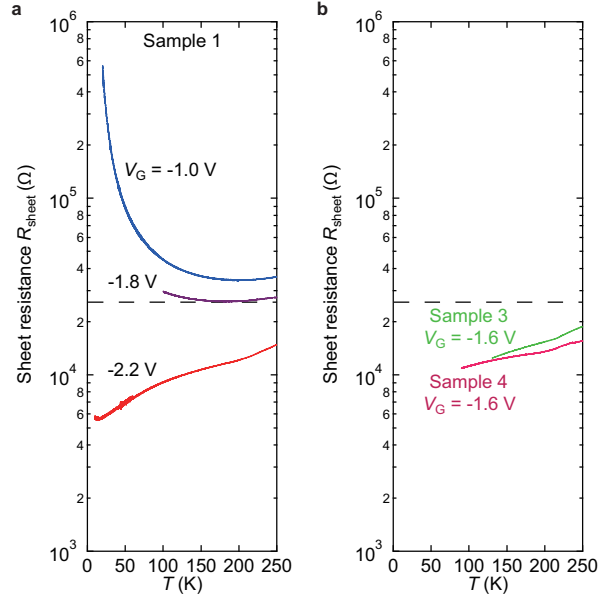

**SI Fig. B-2: The temperature dependence of sheet resistance  $R_S$ .**

With the experimentally-obtained Hall voltage  $V_{\text{Hall}}$ , the Hall mobility  $\mu_{\text{Hall}} = \sigma_{4T} R_H$  and Hall carrier density  $n_{\text{Hall}} = (eR_H)^{-1}$  are determined, in which the Hall coefficient  $R_H$  is obtained from Hall resistance  $R_{xy} = V_{\text{Hall}} / I_D = R_H B$ . For sample 1,  $\mu_{\text{Hall}}$  at  $V_G = -1.0$  V decreases as temperature decreases with the activation energy  $E_a = 4.2$  meV obtained by fitting with an Arrhenius-type thermally activated model  $\mu_{\text{Hall}}(T) \propto \exp(-E_a/(k_B T))$  (see the dotted curve in B-3a).

By contrast, the temperature dependence of  $\mu_{\text{Hall}}$  at  $V_G = -2.2$  V clearly increases monotonically with a decrease in temperature (Fig. B-3a), where  $\mu_{\text{Hall}}$  is estimated to be  $5 \text{ cm}^2 \text{ V}^{-1} \text{ s}^{-1}$  at 200 K, and increases up to  $25 \text{ cm}^2 \text{ V}^{-1} \text{ s}^{-1}$  at 15 K. The temperature dependence of  $\mu_{\text{Hall}}$  can be fitted with  $\mu \propto T^{-q}$  ( $q > 0$ ). The exponent  $q$  in the power-dependence is estimated to be  $q = 0.86$ . This is in a good agreement with those dominated by phonon scattering, which has been observed experimentally and theoretically for  $\text{C}_8\text{-DNBDT-NW}$ .<sup>1</sup> This typical metallic temperature behavior is also observed in the sample 3 at  $V_G = -1.6$  V and sample 4 at  $V_G = -1.6$  V (Fig. B-3b). Although the high  $\mu_{\text{Hall}}$  exceeding  $20 \text{ cm}^2 \text{ V}^{-1} \text{ s}^{-1}$  is experimentally observed at  $T = 15$  K, a discrepancy in the temperature dependence of  $\mu_{\text{Hall}}$  from the power-law behavior is found below  $T = 50$  K. This behavior is consistent with a typical 2D electron/hole system, in which carrier transport is dominated by phonon scattering down to low temperatures because of few impurities in the conducting channel and then

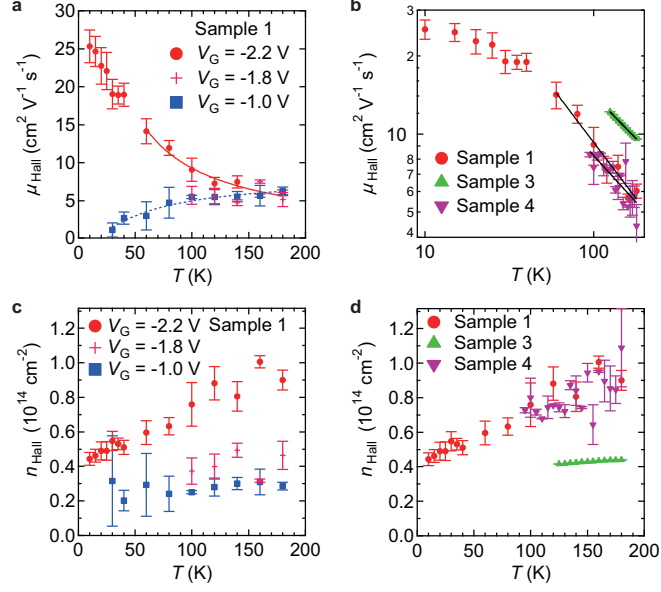

**SI Fig. B-3: The temperature dependence of Hall mobility  $\mu_{\text{Hall}}$  and Hall carrier density  $n_{\text{Hall}}$ .** (a) and (c) The temperature dependence of  $\mu_{\text{Hall}}$  and  $n_{\text{Hall}}$  respectively of sample 1 at various  $V_G$ . (b) and (d) The temperature dependence of  $\mu_{\text{Hall}}$  and  $n_{\text{Hall}}$  respectively of sample 3 at  $V_G = -1.6$  V and sample 4 at  $V_G = -1.6$  V compared with that of sample 1 at  $V_G = -2.2$  V.

dominated by defect impurities scattering at cryogenic temperature, resulting in suppressing mobility.<sup>4</sup> The Hall carrier density  $n_{\text{Hall}}$  is estimated to be  $1 \times 10^{14} \text{ cm}^{-2}$  at 200 K and  $4 \times 10^{13} \text{ cm}^{-2}$  at 15 K (Fig. B-3c). Remarkably high carrier density approaching  $1 \times 10^{14} \text{ cm}^{-2}$  at room temperature corresponds to 0.25 holes per one  $\text{C}_8\text{-DNBDT-NW}$  molecule, which is the highest carrier density observed in OSCs to the best of our knowledge, and clearly shifts the Fermi energy below the top of the valence band, which leads the Fermi degeneracy. The temperature dependence of  $n_{\text{Hall}}$  is also observed in sample 4 with  $n_{\text{Hall}}(180\text{K}) = 1 \times 10^{14} \text{ cm}^{-2}$  (Fig. B-3d).

### C. MAGNEORESISTANCE OF HEAVILY DOPED $\text{C}_8\text{-DNBDT-NW}$

The presence of degenerated holes is further investigated through magnetotransport measurements. Figure C-1a shows the longitudinal magnetoresistance (defined as  $(R(B) - R(0))/R(0)$ ) with respect to the application of  $B$  perpendicular to the sample plane. The positive magnetoresistance is observed over a wide temperature range, which is in a good agreement with the well-established Lorentz magnetoresistance. The characteristic phe-

phenomenon that features 2D electron system is quantum galvanomagnetic effects such as Shubnikov-de Haas (SdH) effect. In general, SdH oscillation due to the quantized Landau levels is observable in sufficiently strong magnetic field, *i.e.*  $\omega_c\tau = \mu B_z \gg 1$  ( $\omega_c$ ; the cyclotron angular momentum,  $\tau$ ; the momentum relaxation time). The mobilities in 2DHG in the wide-gap semiconductors are not high compared to those in 2DEG because of the high effective mass of holes in the valence band. Hence, the direct observation of SdH oscillation has not been achieved to date. On the other hand, in weak magnetic fields, the magnetotransport can be described by the semiclassical Boltzmann transport framework; the positive magnetoresistance is expected with a parabolic dependence to the applied magnetic field, *i.e.*,  $(R(B) - R(0))/R(0) = \mu_{\text{MR}}^2 B^2$ . Here, the mobility  $\mu_{\text{MR}}$  is the only fitting parameter that can reproduce the magnitude of the positive magnetoresistance (shown in black curves). We summarize the temperature dependence of two mobilities determined from the Hall effect ( $\mu_{\text{Hall}}$ ) and longitudinal magnetoresistance ( $\mu_{\text{MR}}$ ) in Fig. C-1b. While the temperature dependence  $\mu_{\text{Hall}}$  shows the saturation behavior as temperature decreases, which is interpreted as a crossover in hole transports from phonon scattering to ionized impurity scattering,  $\mu_{\text{MR}}$  increases monotonically as temperature decreases with  $\mu_{\text{MR}} \propto T^{-q}$  ( $q = 0.87$ ). This discrepancy can be explained by the difference in scattering mechanisms.<sup>4</sup>

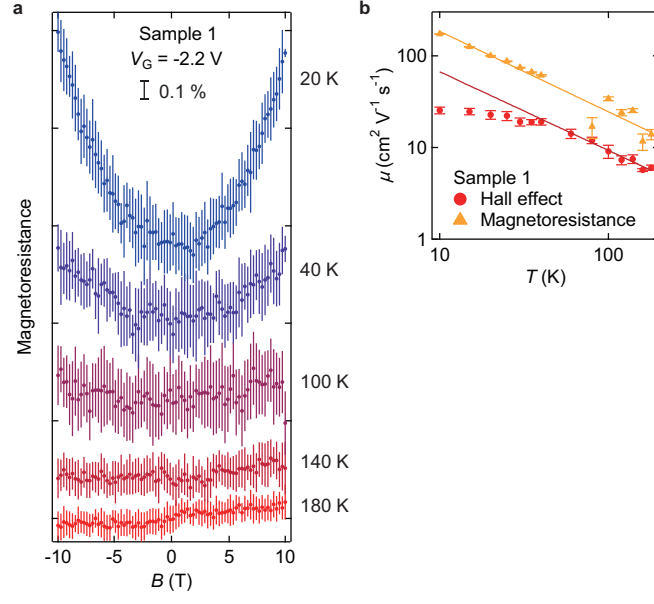

**SI Fig. C-1: The magnetoresistance of sample 1 at  $V_G = -2.2$  V.** (a) The temperature dependence of magnetoresistance of sample 1 at  $V_G = -2.2$  V. (b) The comparison between the Hall mobility and the mobility obtained from magnetoresistance.

## A. Reference

---

- <sup>1</sup> Tsurumi, J. *et al.* Coexistence of ultra-long spin relaxation time and coherent charge transport in organic single-crystal semiconductors. *Nature Physics* **13**, 994–998 (2017).
- <sup>2</sup> Soeda, J. *et al.* Inch-size solution-processed single-crystalline films of high-mobility organic semiconductors. *Applied Physics Express* **6**, 076503 (2013).
- <sup>3</sup> Yamamura, A. *et al.* Wafer-scale, layer-controlled organic single crystals for high-speed circuit operation. *Science Advances* **4**, eaao5758 (2018).
- <sup>4</sup> Davies, J. H. *The Physics of Low-Dimensional Semiconductors*, 290–366 (Cambridge University Press, New York, NY, USA, 1998).
